# Supplementary material
Source: Elsevier journal article supplement (https://www.sciencedirect.com/science/article/pii/S0085562617301668)
Supplement: mmc1 [file S0085562617301668:mmc1.docx]

Supplementary Material:


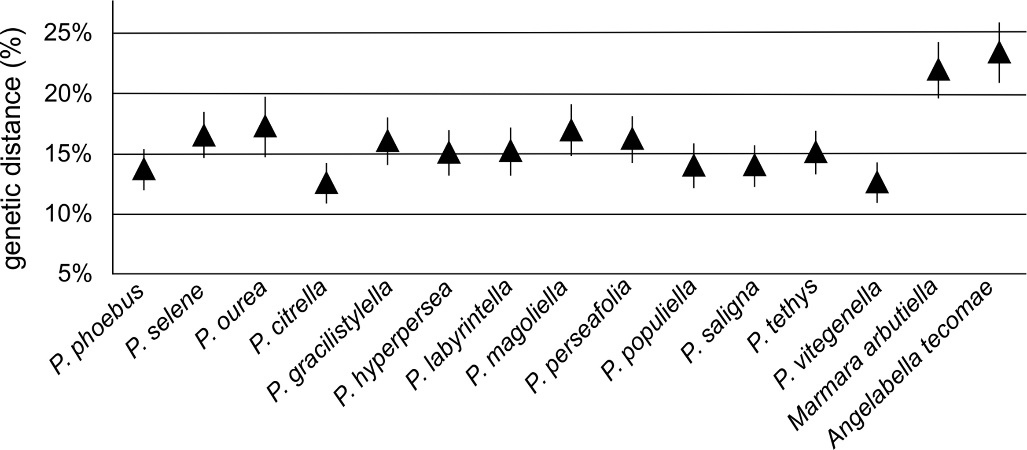


Fig. S1. Graph depicting pairwise genetic distance (in percentage) between *P. hemera* and other congeners, as well as outgroups (*Angelabella* and *Marmara*) based on 660 base pairs of the ‘DNA barcode’ region of the cytochrome oxidase I (COI) gene, using the Kimura 2-parameter model.
